# Supplementary material
Source: PubMed Central journal article supplement (PMC10481233)

## Supplemental Online Content

Nam HS, Kim YD, Heo J, et al; OPTIMAL-BP Trial Investigators. Intensive vs conventional blood pressure lowering after endovascular thrombectomy in acute ischemic stroke. *JAMA*. Published September 5, 2023.  
doi:10.1001/jama.2023.14590

**eTable 1.** Inclusion and Exclusion Criteria

**eTable 2.** Demographic and Clinical Characteristics in Intention-to-Treat Analysis

**eTable 3.** Changes of Blood Pressure Between Groups

**eTable 4.** Primary and Secondary Outcomes in Per-Protocol Analysis

**eTable 5.** Imaging Findings

**eTable 6.** Post Hoc Sensitivity Analysis Considering Enrollment Site

**eFigure 1.** Prespecified Subgroup Analysis of the Primary Efficacy Outcome in the Primary Analysis Population

**eFigure 2.** The Restricted Cubic Spline Curve According to the Treatment Group

This supplemental material has been provided by the authors to give readers additional information about their work.

**eTable 1. Inclusion and Exclusion Criteria**

---

**Inclusion criteria**

1. Age  $\geq 20$  years
2. Patients who underwent EVT for acute cerebral infarction with large cerebrovascular occlusion (ICA, MCA, M1 or M2, BA, VA, ACA, A1, or PCA, P1)
3. Patients with successful cerebral artery reopening after intraarterial reopening (modified Treatment In Cerebral Infarction score, mTICI 2b or mTICI 3)
4. Patients with elevated BP (systolic BP  $\geq 140$  mmHg) on at least two measurements with a two-minute interval within 2 hours of successful recanalization.

**Exclusion criteria**

1. Age  $< 20$  years
  2. Patients whose BP is less than 140 mmHg after successful recanalization through IAT
  3. Patients with contraindications for use of antihypertensive medication
  4. Patients with symptomatic ICH before participating in the study after the successful arterial reopening
  5. Patients with impaired pre-disease neurological function (modified Rankin Scale, mRS  $> 2$ )
  6. Serious medical or surgical illness
  7. Patients who are deemed hard to recruit for the study by the investigators.
  8. Patients who did not agree to participate in this study
  9. Patients who participated in a study that did not allow duplicate participation
- 

Abbreviation: EVT, endovascular thrombectomy; ICA, internal carotid artery; MCA, middle cerebral artery; BA, basilar artery; VA, vertebral artery; ACA, anterior cerebral artery; PCA, posterior cerebral artery; BP, blood pressure; ICH, intracerebral hemorrhage.

**eTable 2. Demographic and Clinical Characteristics in Intention-to-Treat Analysis**

| Characteristics                                     | Intensive management<br>(N=155) | Conventional management<br>(N=150) |
|-----------------------------------------------------|---------------------------------|------------------------------------|
| <b>Demographics</b>                                 |                                 |                                    |
| Age, mean (SD), y                                   | 73.2 (12.1)                     | 72.9 (10.8)                        |
| Sex, No. (%)                                        |                                 |                                    |
| Female                                              | 63 (40.6)                       | 60 (40.0)                          |
| Male                                                | 92 (59.4)                       | 90 (60.0)                          |
| <b>Medical history, No. (%)</b>                     |                                 |                                    |
| Hypertension                                        | 121 (78.1)                      | 113 (75.3)                         |
| Atrial fibrillation                                 | 77 (49.7)                       | 71 (47.3)                          |
| Diabetes mellitus                                   | 65 (41.9)                       | 65 (43.3)                          |
| Hyperlipidemia                                      | 61 (39.4)                       | 56 (37.3)                          |
| Smoking                                             | 39 (25.2)                       | 29 (19.3)                          |
| Previous stroke                                     | 36 (23.2)                       | 31 (20.7)                          |
| CAOD                                                | 18 (11.6)                       | 16 (10.7)                          |
| Active cancer                                       | 9 (5.8)                         | 5 (3.3)                            |
| Congestive heart failure                            | 7 (4.5)                         | 7 (4.7)                            |
| PAOD                                                | 2 (1.3)                         | 6 (4.0)                            |
| NIHSS score just before EVT <sup>a</sup>            | 13 (6)                          | 13 (7)                             |
| 0-5                                                 | 14 (9.0)                        | 18 (12.0)                          |
| 6-15                                                | 83 (53.5)                       | 81 (54.0)                          |
| ≥16                                                 | 58 (37.4)                       | 51 (34.0)                          |
| Intravenous tissue-type plasminogen activator       | 44 (28.4)                       | 55 (36.7)                          |
| <b>TOAST classification, No. (%)<sup>b</sup></b>    |                                 |                                    |
| Cardioembolism                                      | 76 (49.0)                       | 78 (52.0)                          |
| Large artery atherosclerosis                        | 41 (26.5)                       | 43 (28.7)                          |
| Stroke of other determined etiology                 | 4 (2.6)                         | 1 (0.7)                            |
| Undetermined, negative evaluation                   | 21 (13.5)                       | 23 (15.3)                          |
| Undetermined, two or more causes identified         | 13 (8.4)                        | 5 (3.3)                            |
| <b>Time parameters</b>                              |                                 |                                    |
| Onset to puncture time, median (IQR), minutes       | 388.0 (223.5, 692.5)            | 356.0 (208.0, 730.0)               |
| Puncture to reperfusion time, median (IQR), minutes | 30.0 (22.0, 47.0)               | 31.5 (20.0, 48.0)                  |
| Onset to reperfusion time, median (IQR), minutes    | 421.0 (265.5, 772.0)            | 395.5 (253.0, 764.0)               |
| Onset to randomization time, median (IQR), minutes  | 495.0 (327.5, 825.0)            | 472.5 (315.0, 820.0)               |

Abbreviation: CAOD, coronary artery obstructive disease; PAOD, peripheral artery occlusive disease; NIHSS, National Institute of Health Stroke Scale; EVT, endovascular thrombectomy; TOAST classification, Trial of ORG 10172 in Acute Stroke Treatment classification.

<sup>a</sup>The NIHSS score ranges between 0 and 42, where a score of 0 signifies no symptoms (best outcome), and a score of 42 represents a state of coma (worst outcome).

<sup>b</sup>The TOAST classifications were determined based on a consensus of stroke neurologists in each participating hospital.

**eTable 3. Changes of Blood Pressure Between Groups**

|                                           | Intensive<br>management<br>(N=155) | Conventional<br>management<br>(N=150) | <i>P</i> value |
|-------------------------------------------|------------------------------------|---------------------------------------|----------------|
| <b>BP parameters</b>                      |                                    |                                       |                |
| SBP at enrollment, mean (SD), mmHg        | 155.2 (13.4)                       | 154.8 (14.4)                          | .80            |
| DBP at enrollment, mean (SD), mmHg        | 83.9 (14.4)                        | 85.4 (14.1)                           | .38            |
| SBP at 1h, mean (SD), mmHg                | 135.1 (19.9)                       | 140.6 (19.5)                          | .02            |
| DBP at 1h, mean (SD), mmHg                | 77.8 (16.1)                        | 80.3 (15.3)                           | .17            |
| SBP at 24 h, mean (SD), mmHg              | 128.5 (16.3)                       | 137.1 (19.9)                          | <.001          |
| DBP at 24 h, mean (SD), mmHg              | 70.7 (12.7)                        | 75.1 (11.6)                           | .002           |
| Mean SBP over 24 h, mean (SD), mmHg       | 129.2 (7.7)                        | 138.0 (13.6)                          | <.001          |
| Mean DBP over 24 h, mean (SD), mmHg       | 72.0 (8.1)                         | 77.0 (9.9)                            | <.001          |
| <b>Time in target SBP range (%)</b>       |                                    |                                       |                |
| SBP <140 mmHg, mean (SD)                  | 83.0 (15.3)                        | 54.2 (32.2)                           | <.001          |
| SBP 140-180 mmHg, mean (SD)               | 14.2 (13.5)                        | 42.1 (30.4)                           | <.001          |
| SBP <180 mmHg, mean (SD)                  | 99.6 (1.5)                         | 99.1 (3.1)                            | .07            |
| <b>SBP out of range, No. (%)</b>          |                                    |                                       |                |
| SBP exceeding >180 mmHg at least once     | 6 (3.9)                            | 14 (9.3)                              | .09            |
| SBP exceeding >200 mmHg at least once     | 2 (1.3)                            | 1 (0.7)                               | >.999          |
| SBP dropping <100 mmHg at least once      | 46 (29.7)                          | 26 (17.3)                             | .02            |
| <b>Intravenous BP medication, No. (%)</b> |                                    |                                       |                |
| Nicardipine                               | 115 (74.2)                         | 28 (18.7)                             | <.001          |
| Labetalol                                 | 10 (6.5)                           | 0 (0.0)                               | .004           |

Abbreviation: BP, blood pressure; SBP, systolic blood pressure; DBP, diastolic blood pressure.

**eTable 4. Primary and Secondary Outcomes in Per-Protocol Analysis**

|                                                            | Intensive management<br>(n = 148) | Conventional management<br>(n = 140) | Risk difference<br>(95% CI) | Unadjusted OR<br>(95% CI) | Adjusted OR <sup>a</sup><br>(95% CI) | p-value |
|------------------------------------------------------------|-----------------------------------|--------------------------------------|-----------------------------|---------------------------|--------------------------------------|---------|
| <b>Primary efficacy outcome</b>                            |                                   |                                      |                             |                           |                                      |         |
| Favorable independence at 3 months (mRS score 0-2)         | 59/148<br>(39.8)                  | 80/140<br>(57.1)                     | -17.3 (-28.7 to -5.9)       | 0.50 (0.31 to 0.80)       | 0.52 (0.30 to 0.90)                  | .02     |
| <b>Primary Safety outcomes</b>                             |                                   |                                      |                             |                           |                                      |         |
| Symptomatic intracerebral hemorrhage                       | 12/148<br>(8.1)                   | 11/140<br>(7.9)                      | 0.3 (-6.0 to 6.5)           | 1.04 (0.44 to 2.43)       | 0.96 (0.40 to 2.32)                  | .93     |
| Death related to the index stroke within 3 months          | 12/148<br>(8.1)                   | 7/140<br>(5.0)                       | 3.1 (-2.6 to 8.8)           | 1.68 (0.64 to 4.39)       | 1.65 (0.57 to 4.82)                  | .36     |
| <b>Secondary outcomes</b>                                  |                                   |                                      |                             |                           |                                      |         |
| mRS score reduction (shift analysis)                       |                                   |                                      |                             | 0.55 (0.36 to 0.83)       | 0.62 (0.41 to 0.95)                  | .03     |
| NIHSS score at 24 hours, mean (SD)                         | 11.32 (7.20)                      | 9.01 (6.99)                          |                             | 2.23 (0.58 to 3.88)       | 1.06 (-0.13 to 2.30) <sup>b</sup>    | .08     |
| Excellent recovery of NIHSS score at 24 hours <sup>c</sup> | 23/146<br>(15.8)                  | 36/140<br>(25.7)                     | -1.0 (-19.3 to 0.6)         | 0.54 (0.30 to 0.97)       | 0.60 (0.33 to 1.10)                  | .10     |
| Successful reperfusion at 24 hours <sup>d</sup>            | 126/140<br>(90)                   | 127 /135<br>(94.1)                   | -4.1 (-10.4 to 2.3)         | 0.57 (0.23 to 1.40)       | 0.60 (0.23 to 1.54)                  | .29     |
| Favorable independence at 1 month (mRS score 0-2)          | 54/143<br>(37.8)                  | 71/137<br>(51.9)                     | -4.1 (-25.6 to -2.5)        | 0.56 (0.35 to 0.91)       | 0.64 (0.37 to 1.10)                  | .11     |
| Euro-QoL score, mean (SD)                                  | 0.51 (0.43)                       | 0.64 (0.39)                          |                             | -0.13 (-0.22 to -0.03)    | -0.09 (-0.17 to -0.01) <sup>b</sup>  | .04     |
| Malignant cerebral edema <sup>e</sup>                      | 10/148<br>(6.7)                   | 2/140<br>(1.4)                       | 5.3 (0.8-9.8)               | 5.00 (1.08 to 23.24)      | 6.01 (1.19 to 30.27)                 | .03     |

Abbreviation: EQ-5D-3L, EuroQoL 5-Dimension Self-Report Questionnaire; mRS, modified Rankin Scale; NIHSS, National Institute of Health Stroke Scale; OR, odds ratio.

<sup>a</sup>Adjusted for age, sex, onset to randomization time, and the NIHSS score just before endovascular thrombectomy.

<sup>b</sup>Analyzed with linear regression adjusted for age, sex, onset to randomization time, and the NIHSS score just before endovascular thrombectomy.

<sup>c</sup>Indicates as NIHSS score 0-1 or improvement more than 8.

<sup>d</sup>Successful reperfusion at 24 hours was determined by a modified Treatment In Cerebral Infarction score  $\geq 2$ <sup>b</sup> using MR angiography or CT angiography at 24 hours.

<sup>e</sup>Malignant cerebral edema refers to a condition characterized by rapid neurological deterioration accompanied by substantial brain swelling in CT or MRI, which often leads to death or poor functional outcomes.

**eTable 5. Imaging Findings**

|                                                         | Intensive management (N=155) | Conventional management (N=150) | <i>P</i> value |
|---------------------------------------------------------|------------------------------|---------------------------------|----------------|
| <b>Occlusion site</b>                                   |                              |                                 |                |
| ICA                                                     | 34 (21.9)                    | 32 (21.3)                       | >.999          |
| MCA                                                     | 108 (69.7)                   | 101 (67.3)                      | .75            |
| ACA                                                     | 1 (0.6)                      | 3 (2.0)                         | .59            |
| BA                                                      | 12 (7.7)                     | 12 (8.0)                        | >.999          |
| VA                                                      | 4 (2.6)                      | 3 (2.0)                         | >.999          |
| PCA                                                     | 0 (0.0)                      | 1 (0.7)                         | .99            |
| <b>ASPECTS, median (IQR)</b>                            | 9.0 (7.0-10.0)               | 9.0 (8.0-10.0)                  | .34            |
| <b>ASPECTS category</b>                                 |                              |                                 | .51            |
| 0-5                                                     | 10 (6.6)                     | 7 (4.7)                         |                |
| 6-8                                                     | 56 (36.8)                    | 49 (32.7)                       |                |
| 9-10                                                    | 86 (56.6)                    | 94 (62.7)                       |                |
| <b>Collateral grade<sup>a</sup></b>                     |                              |                                 | .17            |
| Good collateral (2-3)                                   | 102 (70.8)                   | 90 (62.5)                       |                |
| Poor collateral (0-1)                                   | 43 (29.2)                    | 54 (37.5)                       |                |
| <b>Reocclusion</b>                                      | 19 (12.3)                    | 8 (5.3)                         | .05            |
| <b>mTICI immediate</b>                                  |                              |                                 | .69            |
| 2b                                                      | 34 (21.9)                    | 34 (22.7)                       |                |
| 2c                                                      | 18 (11.6)                    | 22 (14.7)                       |                |
| 3                                                       | 103 (66.5)                   | 94 (62.7)                       |                |
| <b>mTICI at 24 hours</b>                                |                              |                                 | .57            |
| 0                                                       | 11 (7.1)                     | 7 (4.7)                         |                |
| 1                                                       | 1 (0.6)                      | 0 (0.0)                         |                |
| 2a                                                      | 3 (1.9)                      | 2 (1.3)                         |                |
| 2b                                                      | 10 (6.5)                     | 14 (9.3)                        |                |
| 2c                                                      | 0 (0.0)                      | 2 (1.3)                         |                |
| 3                                                       | 121 (78.1)                   | 116 (77.3)                      |                |
| <b>Any intracerebral hemorrhage</b>                     | 83 (53.5)                    | 78 (52.3)                       | .93            |
| <b>Hemorrhagic transformation</b>                       |                              |                                 | .95            |
| None                                                    | 77 (49.7)                    | 77 (51.3)                       |                |
| HI1                                                     | 27 (17.4)                    | 24 (16.0)                       |                |
| HI2                                                     | 17 (11.0)                    | 19 (12.7)                       |                |
| PH1                                                     | 17 (11.0)                    | 13 (8.7)                        |                |
| PH2                                                     | 17 (11.0)                    | 17 (11.3)                       |                |
| <b>Infarction volumes, median (IQR), ml<sup>b</sup></b> | 18.6 (6.7-62.6)              | 17.1 (5.4-40.9)                 | .11            |
| <b>Infarction volumes, mean (SD), ml<sup>b</sup></b>    | 60.8 (91.6)                  | 42.1 (73.9)                     | .05            |



Abbreviation: ICA, internal carotid artery; MCA, middle cerebral artery; ACA, anterior cerebral artery; BA, basilar artery; PCA, posterior cerebral artery; VA, vertebral artery; ASPECTS, Alberta Stroke Program Early CT Score; mTICI, modified Treatment In Cerebral Infarction score; HI, hemorrhagic infarction; PH, parenchymal hematoma.

<sup>a</sup>Collateral grade was determined using the Tan scale.

<sup>b</sup>Infarction volume was measured primarily using diffusion-weighted image. In cases where diffusion-weighted image was unavailable, fluid-attenuated inversion recovery image or CT scan were used instead.

**eTable 6. Post Hoc Sensitivity Analysis Considering Enrollment Site**

|                                                            | Unadjusted OR<br>(95% CI) | Adjusted OR <sup>a</sup><br>(95% CI) | <i>P</i> value |
|------------------------------------------------------------|---------------------------|--------------------------------------|----------------|
| <b>Primary efficacy outcome</b>                            |                           |                                      |                |
| Functional independence at 3 months (mRS score 0-2)        | 0.54 (0.41 to 0.72)       | 0.56 (0.43 to 0.72)                  | <.001          |
| <b>Primary Safety outcome</b>                              |                           |                                      |                |
| Symptomatic intracerebral hemorrhage                       | 1.14 (0.51 to 2.52)       | 1.10 (0.48 to 2.53)                  | .82            |
| Death related to the index stroke within 3 months          | 1.49 (0.72 to 3.10)       | 1.73 (0.65 to 4.59)                  | .28            |
| <b>Secondary outcome</b>                                   |                           |                                      |                |
| mRS score reduction (shift analysis)                       | 0.59 (0.45 to 0.78)       | 0.65 (0.50 to 0.84)                  | .001           |
| NIHSS score at 24 hours                                    | 2.00 (0.33 to 3.66)       | 1.05 (-0.17 to 2.27) <sup>b</sup>    | .09            |
| Excellent recovery of NIHSS score at 24 hours <sup>c</sup> | 0.59 (0.34 to 1.02)       | 0.63 (0.35 to 1.12)                  | .12            |
| Successful reperfusion at 24 hours <sup>d</sup>            | 0.65 (0.23 to 1.81)       | 0.65 (0.25 to 1.72)                  | .39            |
| Functional independence at 1 month (mRS score 0-2)         | 0.60 (0.44 to 0.81)       | 0.65 (0.49 to 0.87)                  | .003           |
| EQ-5D-3L score                                             | -0.12 (-0.21 to -0.02)    | -0.08 (-0.16 to -0.01) <sup>b</sup>  | .04            |
| Malignant cerebral edema <sup>e</sup>                      | 6.16 (1.79 to 21.23)      | 8.05 (2.80-23.19)                    | <.001          |

Abbreviation: EQ-5D-3L, EuroQoL 5-Dimension Self-Report Questionnaire; mRS, modified Rankin Scale; NIHSS, National Institute of Health Stroke Scale; OR, odds ratio.

<sup>a</sup>Adjusted for age, sex, onset to randomization time, and the NIHSS score just before

endovascular thrombectomy.

<sup>b</sup>Analyzed with linear regression adjusted for age, sex, onset to randomization time, and the NIHSS score just before endovascular thrombectomy.

<sup>c</sup>Indicates as NIHSS score 0-1 or improvement more than 8.

<sup>d</sup>Successful reperfusion at 24 hours was determined by a modified Treatment In Cerebral Infarction score  $\geq 2$ <sup>b</sup> using MR angiography or CT angiography at 24 hours.

<sup>e</sup>Malignant cerebral edema refers to a condition characterized by rapid neurological deterioration accompanied by substantial brain swelling in CT or MRI, which often leads to death or poor functional outcomes.

## eFigure 1. Prespecified Subgroup Analyses of the Primary Efficacy Outcome in the Primary Analysis Population

There were no significant interactions observed in any predetermined subgroup with favorable outcomes. The intensive management was associated with unfavorable outcomes across all strata.

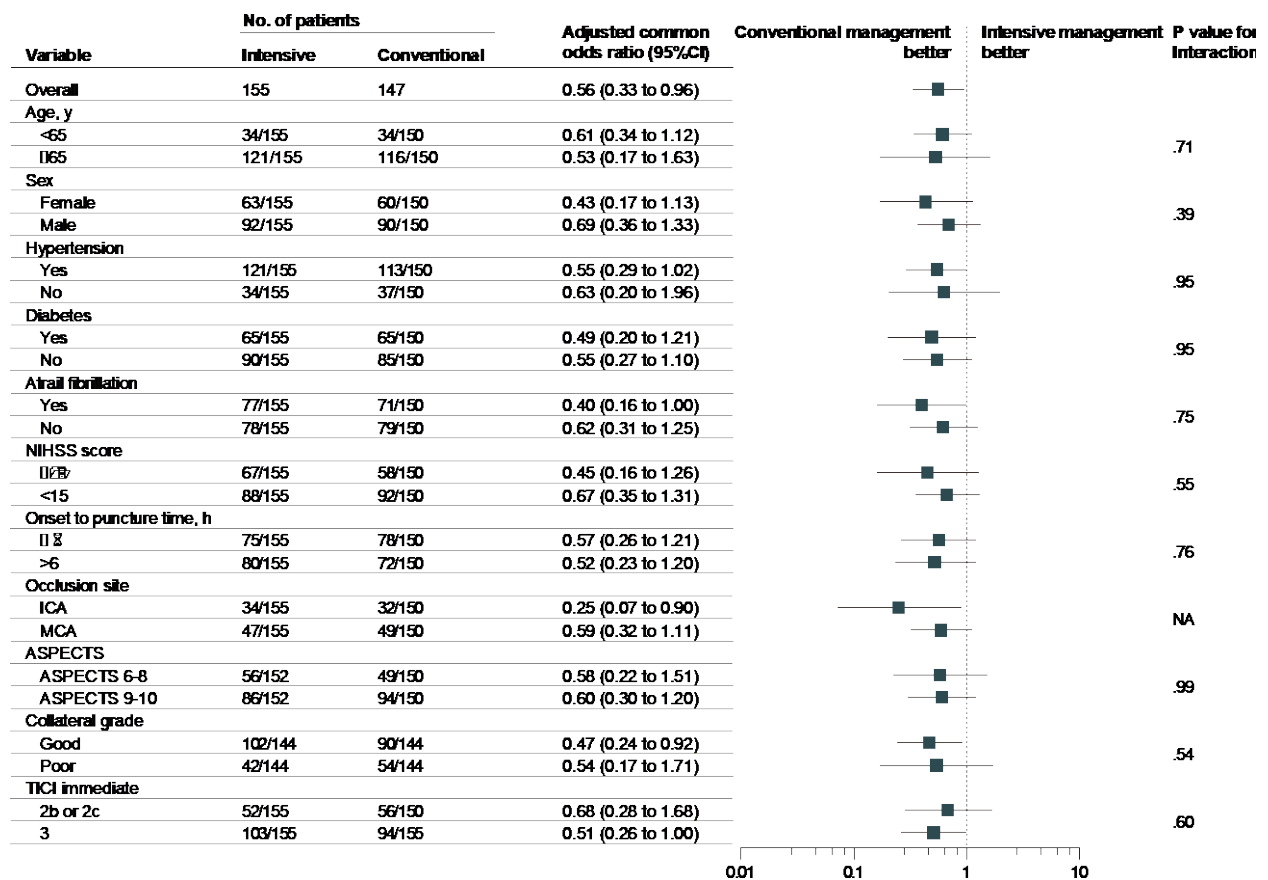

**eFigure 2. The Restricted Cubic Spline Curve According to the Treatment Group**

Panel A, intensive management exhibited a reverse J-shape correlation between the mean 24-hour SBP and dependent or dead outcome, indicating a significant association between lower the mean 24-hour SBP and worse outcomes. Panel B, the conventional management demonstrated a linear correlation between the mean 24-hour SBP and dependent or dead outcome, suggesting that higher the mean 24-hour BP was associated with worse outcomes.

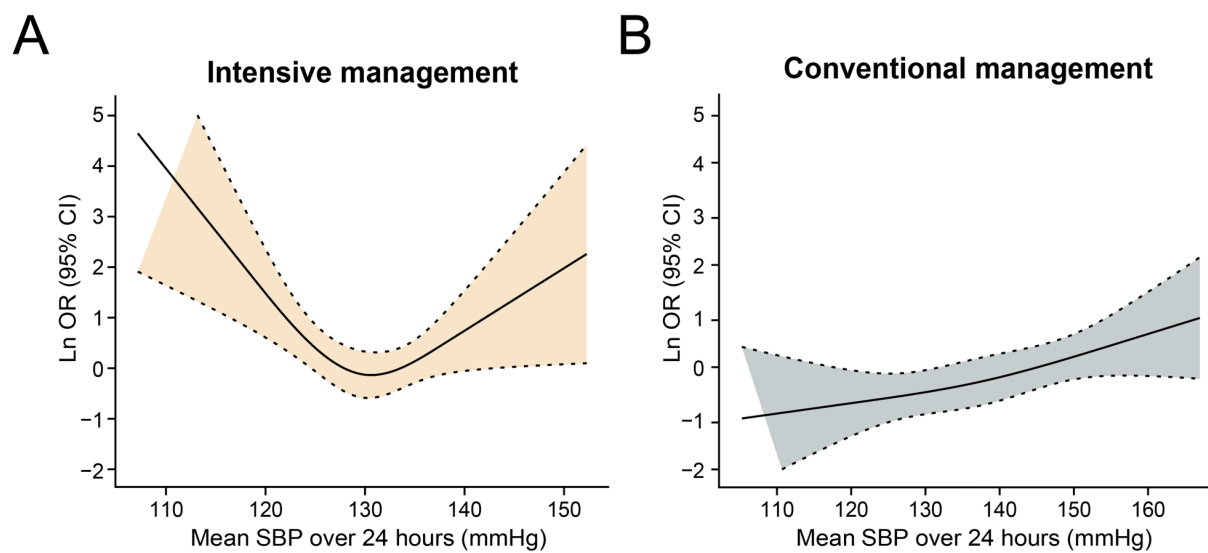

Supplement: jama-e2314590-s003.pdf [file jama-e2314590-s003.pdf]
