# Supplementary material
Source: PubMed Central journal article supplement (PMC10481233)
Supplement: jama-e2314590-s002.pdf [file jama-e2314590-s002.pdf]

1 **Outcome in patients treated with intra-arterial thrombectomy: the optiMAL Blood-Pressure**  
2 **Control (OPTIMAL-BP) Trial**

3

4

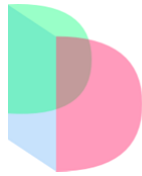

# OPTIMAL-BP

Outcome in Patients Treated with Intraarterial Recanalization Therapy -  
Optimal Arterial Blood Pressure Control

5

6

7

8

9

## **Statistical Analysis Plan**

10

Version :1.0 (final)

11

Data: 21 FEBRUARY, 2023

12

13

14

15

16

17 **Corresponding author:**

18 Hyo Suk Nam, MD, PhD,

19 Department of Neurology, Yonsei University College of Medicine,

20 50-1 Yonsei-ro, Seodaemoon-gu, Seoul 03722, Korea

21 Tel: 82-2-2228-1617; Fax: 82-2-393-0705; E-mail: [hsnam@yuhs.ac](mailto:hsnam@yuhs.ac)

22

23

## Abbreviation

| Abbreviation | Full title                                                                                       |
|--------------|--------------------------------------------------------------------------------------------------|
| ACA          | Anterior cerebral artery                                                                         |
| ASPECTS      | Alberta Stroke Program Early CT Score                                                            |
| BA           | Basilar artery                                                                                   |
| BP           | Blood pressure                                                                                   |
| CI           | Confidence interval                                                                              |
| CRF          | Case Report Form                                                                                 |
| CT           | Computed Tomography                                                                              |
| CTA          | Computed Tomography Angiography                                                                  |
| DSMB         | Data Safety Management Board                                                                     |
| ECASS III    | European Cooperative Acute Stroke Study III                                                      |
| eCRF         | Electronic case report form                                                                      |
| EQ-5D-3L     | EuroQoL 5-Dimension Self-Report Questionnaire                                                    |
| HI           | Hemorrhage infarction                                                                            |
| IAT          | Intra-arterial thrombectomy                                                                      |
| ICA          | Internal carotid artery                                                                          |
| ICH          | Intracerebral hemorrhage                                                                         |
| IQR          | Interquartile range                                                                              |
| MCA          | Middle cerebral artery                                                                           |
| MRI          | Magnetic Resonance Imaging                                                                       |
| mRS          | Modified Rankin Scale                                                                            |
| mTICI        | Modified Treatment In Cerebral Infarction                                                        |
| NIHSS        | National Institute of Health Stroke Scale                                                        |
| OPTIMAL-BP   | Outcome in patients treated with intra-arterial thrombectomy: the optiMAL Blood-Pressure Control |

|       |                                                                             |
|-------|-----------------------------------------------------------------------------|
| OR    | Odds ratio                                                                  |
| PCA   | Posterior cerebral artery                                                   |
| PH    | Parenchymal hematoma                                                        |
| PP    | Per-protocol                                                                |
| PROBE | Prospective, randomized, open-label trial with blinded end-point assessment |
| SBP   | Systolic blood pressure                                                     |
| TOAST | Trial of Org 10 172 in acute stroke treatment                               |

---

# CONTENTS

27

|    |                                                                |           |
|----|----------------------------------------------------------------|-----------|
| 28 | <b>1. Administrative information.....</b>                      | <b>7</b>  |
| 29 | <i>1.1 Study identifiers .....</i>                             | <i>7</i>  |
| 30 | <i>1.2 Revision history.....</i>                               | <i>7</i>  |
| 31 | <i>1.3 Contributors to the statistical analysis plan .....</i> | <i>7</i>  |
| 32 | 1.3.1 Roles and responsibilities .....                         | 7         |
| 33 | 1.3.2 Approvals .....                                          | 8         |
| 34 | <b>2. Introduction.....</b>                                    | <b>10</b> |
| 35 | <i>2.1 Study synopsis .....</i>                                | <i>10</i> |
| 36 | <i>2.2 Study population .....</i>                              | <i>10</i> |
| 37 | 2.2.1 Inclusion criteria .....                                 | 10        |
| 38 | 2.2.2 Exclusion criteria .....                                 | 10        |
| 39 | <i>2.3 Study interventions.....</i>                            | <i>11</i> |
| 40 | 2.3.1 Randomization .....                                      | 11        |
| 41 | 2.3.2 Study treatment.....                                     | 11        |
| 42 | <i>2.4 Outcomes.....</i>                                       | <i>12</i> |
| 43 | 2.4.1 Primary outcome.....                                     | 12        |
| 44 | 2.4.2 Secondary outcomes .....                                 | 12        |
| 45 | <i>2.5 Sample size.....</i>                                    | <i>13</i> |
| 46 | 2.5.1 Number of clinical trial subjects calculated.....        | 13        |
| 47 | 2.5.2 Hypothesis.....                                          | 13        |
| 48 | 2.5.3 Sample size calculation.....                             | 13        |
| 49 | <b>3. Statistical analysis .....</b>                           | <b>17</b> |

|    |                                                                   |    |
|----|-------------------------------------------------------------------|----|
| 50 | <i>3.1 Statistical principles</i> .....                           | 17 |
| 51 | 3.1.1 Primary and Secondary outcomes.....                         | 17 |
| 52 | 3.1.2 Software .....                                              | 18 |
| 53 | <i>3.2 Data sets analyzed</i> .....                               | 18 |
| 54 | 3.2.1 Intention-to-treat (ITT) population (primary analysis)..... | 18 |
| 55 | 3.2.2 Per-protocol (PP) analysis.....                             | 18 |
| 56 | <i>3.3 Subject disposition</i> .....                              | 18 |
| 57 | <i>3.4 Patient characteristics and baseline comparisons</i> ..... | 19 |
| 58 | <i>3.5 Protocol deviation</i> .....                               | 19 |
| 59 | <i>3.6 BP management</i> .....                                    | 19 |
| 60 | <i>3.7 Analysis of the primary outcome</i> .....                  | 20 |
| 61 | 3.7.1 Binary analysis of mRS .....                                | 20 |
| 62 | 3.7.2 Symptomatic intracranial hemorrhage (sICH).....             | 20 |
| 63 | 3.7.3 Death related to the index stroke within 3 months. ....     | 20 |
| 64 | 3.7.4 Subgroup analyses .....                                     | 21 |
| 65 | 3.7.5 Treatment of missing data.....                              | 22 |
| 66 | <i>3.8 Analysis of the secondary outcome</i> .....                | 22 |
| 67 | 3.8.1 Shift analysis of mRS .....                                 | 22 |
| 68 | 3.8.2 NIHSS score at 24 hours.....                                | 23 |
| 69 | 3.8.3 Excellent recovery of NIHSS score at 24h .....              | 23 |
| 70 | 3.8.4 Recanalization status at 24h.....                           | 23 |
| 71 | 3.8.5 Favorable outcome at 1 month (mRS score 0-2) .....          | 23 |
| 72 | 3.8.6 Euro-QoL .....                                              | 24 |
| 73 | 3.8.7 Malignant brain edema .....                                 | 24 |

74 3.9 Interim analysis plan.....24

75 4. References.....25

76 5. Figure .....28

77 Figure 1. CONSORT flowchart .....28

78

79

80

81

82

83

84

85

86

87

88

89

90

91

92

93

94

95

---

96 **1. Administrative information**

97 **1.1 Study identifiers**

98 Protocol Version: 2.2 Date: 19 May 2021

99 Clinical Trials.gov register identifier: NCT04205305

100

101 **1.2 Revision history**

| Version     | Date        | Details                                                                                |
|-------------|-------------|----------------------------------------------------------------------------------------|
| 0.1 (draft) | 12 Jan 2023 | First draft by Hye Sun Lee, Soyoung Jeon, and Hyo Suk Nam                              |
| 0.2 (draft) | 01 Feb 2023 | New version following review by Hye Sun Lee, Soyoung Jeon, Hyo Suk Nam, and Ji Hoe Heo |
| 1.0 (final) | 21 Feb 2023 | New version following review by Hye Sun Lee, Soyoung Jeon, Hyo Suk Nam, and Ji Hoe Heo |

102

103 **1.3 Contributors to the statistical analysis plan**

104 **1.3.1 Roles and responsibilities**

| Name and ORCID                                   | Affiliation                                                                                          | Role on study         | SAP contribution                            |
|--------------------------------------------------|------------------------------------------------------------------------------------------------------|-----------------------|---------------------------------------------|
| Prof. Hye Sun Lee<br>(ORCID 0000-0001-6328-6948) | Department of Research<br>Affairs, Biostatistics<br>Collaboration Unit,<br>Yonsei University College | Study<br>statistician | Prepared initial draft<br>and all revisions |

|                                                      |                                                                                                                                      |                           |                                             |
|------------------------------------------------------|--------------------------------------------------------------------------------------------------------------------------------------|---------------------------|---------------------------------------------|
|                                                      | of Medicine, Seoul,<br>Korea                                                                                                         |                           |                                             |
| PhD, Soyoung Jeon<br>(ORCID 0000-0002-<br>9916-1917) | Department of Research<br>Affairs, Biostatistics<br>Collaboration Unit,<br>Yonsei University College<br>of Medicine, Seoul,<br>Korea | Study<br>statistician     | Prepared initial draft<br>and all revisions |
| Prof. Ji Hoe Heo<br>(ORCID 0000-0001-<br>9898-3321)  | Department of Neurology,<br>Yonsei University College<br>of Medicine                                                                 | Investigator              | Reviewed 0.2 to<br>final version            |
| Prof. Hyo Suk Nam<br>(ORCID 0000-0002-<br>4415-3995) | Department of Neurology,<br>Yonsei University College<br>of Medicine                                                                 | Principal<br>investigator | Reviewed all<br>versions                    |

105

106 **1.3.2 Approvals**

107 The undersigned have reviewed this plan and have deemed it to be the final version and in  
108 accordance with the protocol requirements within their respective areas. It is also compliant with the  
109 International Council for Harmonisation of Technical Requirements for Pharmaceuticals for Human  
110 Use (ICH) E9 Statistical Principles for Clinical Trials.

111

| Name              | Signature                                                                           | Date        |
|-------------------|-------------------------------------------------------------------------------------|-------------|
| Prof. Hye Sun Lee |  | 21 Feb 2023 |



|                   |                                                                                   |             |
|-------------------|-----------------------------------------------------------------------------------|-------------|
| Soyoung Jeon      | JSY                                                                               | 21 Feb 2023 |
| Prof. Ji Hoe Heo  |  | 22 Feb 2023 |
| Prof. Hyo Suk Nam |  | 22 Feb 2023 |

112

113

114

115

116

117

118

119

120

---

121 **2. Introduction**

122 **2.1 Study synopsis**

123 We compare the treatment effectiveness and safety between the two groups by dividing them into the  
124 intensive control group (less than 140 mmHg of SBP) and the standard control group (SBP 140-180  
125 mmHg) for patients who had successful reopening of occluded large cerebral artery following intra-  
126 arterial thrombectomy (IAT).

127

128 **2.2 Study population**

129 This study being conducted at 19 hospital sites in South Korea, including Severance Hospital, Yonsei  
130 University College of Medicine

131

132 **2.2.1 Inclusion criteria**

133 1. Age  $\geq 20$  years

134 2. Patients who underwent IAT for acute cerebral infarction with large cerebrovascular occlusion  
135 (ICA, MCA, M1 or M2, BA, VA, ACA, A1, or PCA, P1)

136 3. Patients with successful cerebral artery reopening after intraarterial reopening (modified Treatment  
137 In Cerebral Infarction score, mTICI 2b or mTICI 3)

138 4. Patients with elevated BP (SBP  $\geq 140$  mmHg) on at least two measurements with a two-minute  
139 interval within 2 hours of successful recanalization.

140

141 **2.2.2 Exclusion criteria**

142 1. Age  $< 20$  years

143 2. Patients whose BP is less than 140 mmHg after successful recanalization through IAT

144 3. Patients with contraindications for use of antihypertensive medication

- 145 4. Patients with symptomatic ICH before participating in the study after the successful arterial  
146 reopening
- 147 5. Patients with impaired pre-disease neurological function (modified Rankin Scale, mRS >2)
- 148 6. Serious medical or surgical illness
- 149 7. Patients who are deemed hard to recruit for the study by the investigators.
- 150 8. Patients who did not agree to participate in this study
- 151 9. Patients who participated in a study that did not allow duplicate participation

152

## 153 **2.3 Study interventions**

### 154 **2.3.1 Randomization**

155 The study was conducted as a prospective, randomized, open-label trial with a blinded end-point  
156 assessment (PROBE). After successful arterial reopening, the ratio of the intensive group (<140 mm  
157 Hg) and conventional group (140-180 mm Hg) proceeds to 1:1. A four-block design randomization  
158 was implemented with a block size of 4. The strata were divided based on participating hospitals and  
159 NIHSS score <15, or ≥15, and treatment group (the intensive group or the conventional group).

160

161 Investigator generated the random allocation using a computerized random sequence generation that  
162 was centrally administrated via a password-protected, web-based program at  
163 <https://obp.smartstroke.net>. Once a selection is made, the randomization record is tagged with the  
164 patient study allocated identifier, date and time of randomization. A tagged record cannot be selected  
165 more than once. Investigator enrolled participants and assigned according to randomized allocation.

166

### 167 **2.3.2 Study treatment**

168 **Intensive group** : the SBP target was <140 mm Hg, obtaining consent form, measuring BP at 1-hour  
169 intervals after obtaining consent, and collecting BP and pulse data up to 24 hours.

170 **Control group** : the SBP target was 140-180 mm Hg, obtaining consent form, measuring BP at 1-  
171 hour intervals after obtaining consent, and collecting BP and pulse data up to 24 hours.

172

## 173 **2.4 Outcomes**

### 174 **2.4.1 Primary outcome**

175 1) primary efficacy outcome

176 - Functional independence at 3 months, defined as a modified Rankin Scale (mRS) score of 0 to 2

177 2) primary safety outcomes

178 A. symptomatic ICH within 36 hours

179 ✓ Bleeding or hemorrhagic transformation on MRI or CT performed within  $24 \pm 12$  hours or as  
180 symptoms worsen

181 ✓ Definition of symptomatic hemorrhage according to the European Cooperative Acute Stroke  
182 Study III (ECASS III) meets the following three criteria:

183 • Any cerebral hemorrhage

184 • NIHSS score worse than 4 points or death

185 • When neurological deterioration is associated with cerebral hemorrhage

186 B. Stroke-related death within 90 days

187

### 188 **2.4.2 Secondary outcomes**

189 1) Differences in mRS ordinal shift analysis

190 2) Difference in NIHSS scores at 24 hours after IAT

191 3) Excellent Day 1 Recovery [Major Neurological Improvement]: NIHSS score of 0-1 or  
192 improvement  $>8$

193 4) Recanalization status on CT Angiography (CTA) or MR Angiography (MRA) at 24 hours

194 5) Frequency of occurrence of malignant brain edema

195 6) Health-related quality of life, as assessed by the EuroQoL group EQ-5D-3L

196

## 197 **2.5 Sample size**

### 198 **2.5.1 Number of clinical trial subjects calculated**

199 668 patients (334 in each group, significance level  $\alpha=0.05$ , statistical power  $1-\beta=0.80$ , dropout rate  
200 5%)

201

### 202 **2.5.2 Hypothesis**

203  $H_0: P_A - P_B = 0$  (the ratio of poor outcomes in groups A and B is the same)

204  $H_1: P_A - P_B \neq 0$  (the ratio of poor outcomes between groups A and B is not the same)

205

### 206 **2.5.3 Sample size calculation**

207 We conducted a systematic review to determine the sample-size calculation. We searched Medline  
208 and Embase for relevant clinical studies published between January 1993 and October 2019. The  
209 following search terms were used: “BP,” “hypertension,” “thrombectomy,” or “endovascular.” We  
210 manually searched references of identified studies. Searches were restricted to human studies with  
211 full English text. The reference lists of retrieved reports were also hand searched for potentially  
212 relevant studies not identified in our electronic database search.

213 Studies included in this analysis met the following criteria: (1) IAT for ischemic stroke, (2) inclusion  
214 of patients with acute ischemic stroke with large-vessel occlusion, (3) analysis comparing the  
215 outcomes according to BP within 24 hours after successful recanalization with IAT, and (4) outcome  
216 measurements, including mRS score, at 90 days or symptomatic ICH. We also obtained the baseline  
217 characteristics from each study: sample size, intervention type, intervention time, baseline National  
218 Institutes of Health Stroke Scale (NIHSS) score, baseline BP, functional outcome or 90-day  
219 mortality, and symptomatic ICH. Two reviewers (YDK and JKC) independently extracted data, and

220 disagreements were resolved by consensus. For continuous outcomes (90-day ordinal mRS score)  
 221 and dichotomous outcomes (symptomatic ICH), we used the odds ratio (OR) with 95% confidence  
 222 interval (CI) and *P*-values to assess the likelihood of outcomes.

223

224 Of a total of 3,436 articles identified, 9 met the inclusion criteria (Figure A). Among the seven  
 225 articles regarding the outcome, two were excluded: one because we could not calculate the effect  
 226 size, and the other because no regression coefficient was reported. Finally, five papers that used  
 227 continuous systolic BP (SBP) were chosen. The OR was calculated using the generic inverse  
 228 variance estimation method. A 10-mmHg increase in the mean SBP  $\leq$  24 hours after successful  
 229 recanalization with IAT was correlated with worse 90-day mRS (OR 1.45, 95% CI 1.14–1.83, *p* =  
 230 0.002) (Figure B). Symptomatic ICH was not associated with a mean SBP increase of 10 mmHg  
 231 after successful recanalization with IAT (OR 1.14, 95% CI 0.91–1.43, *p* = 0.267) (Figure C).

232

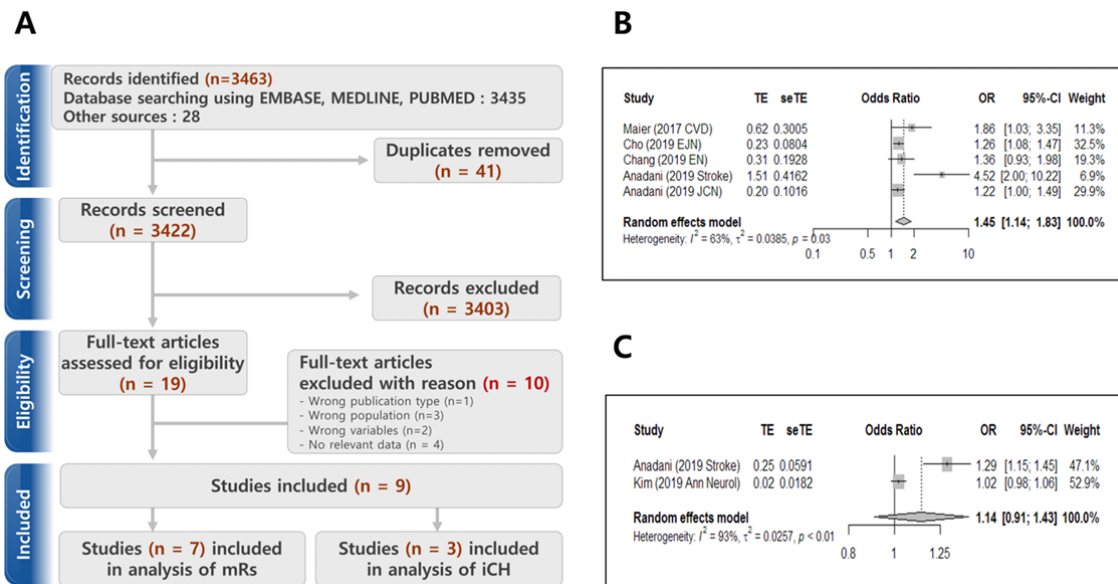

233

234

235 A study by Goyal et al. used a design similar to ours with an aggressive SBP-lowering target of <140  
 236 mmHg.<sup>1</sup> They compared an aggressive SBP-lowering target of <140 / 90 mmHg with a moderate or  
 237 permissive BP target of <185 / 105 mmHg.

238

|   | Studies                     | Ordinal or logistic regression             | OR (95% CI)             | Adjusted OR (95% CI) per 10 mmHg for poor outcome | Number of patients | Measurements   |
|---|-----------------------------|--------------------------------------------|-------------------------|---------------------------------------------------|--------------------|----------------|
| 1 | Maier (2017) <sup>2</sup>   | OR (1 mmHg) for good outcome               | 0.94 (0.88–0.99)        | 1.86 (1.11–3.59)                                  | 168                | Continuous SBP |
| 2 | Cho (2019) <sup>3</sup>     | OR (10 mmHg) for ordinal mRS               | 1.26 (1.08–1.48)        | 1.26 (1.08–1.48)                                  | 313                | Continuous SBP |
| 3 | Chang (2019) <sup>4</sup>   | OR (10 mmHg) for ordinal mRS               | 1.36 (0.93–1.98)        | 1.36 (0.93–1.98)                                  | 90                 | Continuous SBP |
| 4 | Anadani (2019) <sup>5</sup> | OR (1 mmHg) for good outcome               | 0.86 (0.79–0.93)        | 4.52 (2.07–10.56)                                 | 1149               | Continuous SBP |
| 5 | Anadani (2019) <sup>6</sup> | OR (1 mmHg) for good outcome               | 0.98 (0.96–0.999)       | 1.22 (1.01–1.50)                                  | 276                | Continuous SBP |
|   | Subtotal                    | OR (10 mmHg) for ordinal mRS               |                         | <b>1.45 (1.14–1.83)</b>                           | 1996               |                |
| 6 | Goyal (2017) <sup>1</sup>   | OR for poor outcome (ref: intensive group) | <b>2.19 (0.54–8.86)</b> |                                                   | 140                | Target SBP     |
|   |                             | OR for good outcome (ref: intensive group) | 0.46 (0.11–1.84)        |                                                   |                    |                |

239

240 **Outcome according to target BPs in Goyal's article<sup>1</sup>**

|                                                         | Good outcome (mRS 0–2) | Poor outcome (mRS 3–6) | Total      |
|---------------------------------------------------------|------------------------|------------------------|------------|
| Intensive group (Target BP < 140/90 mmHg)               | 7 (70%)                | 3 (30%)                | 10 (100%)  |
| Moderate or permissive group (Target BP < 185/105 mmHg) | 67 (52%)               | 63 (48%)               | 130 (100%) |

241

242 According to the study by Goyal et al., the calculated OR of poor outcome in the moderate or  
 243 permissive group was 2.19 (95% CI 0.54–8.86) compared with that of the intensive group.

244

245  $OR \text{ for poor outcome} = \frac{63/67}{3/7} = 2.19$

246  $CI = \left( e^{\ln(OR) - 1.96 \sqrt{\frac{1}{63} + \frac{1}{67} + \frac{1}{3} + \frac{1}{7}}}, e^{\ln(OR) + 1.96 \sqrt{\frac{1}{63} + \frac{1}{67} + \frac{1}{3} + \frac{1}{7}}} \right)$

247 Using these ORs, we calculated the weighted average as follows:

248

$$OR^* = \frac{m_1}{M} OR_1 + \frac{m_2}{M} OR_2 = \frac{140}{539} \times 2.19 + \frac{399}{539} \times 1.45 = 1.64$$

249

250 where OR1 is from Goyal et al.'s study<sup>6</sup> and OR2 is from our systematic review. Finally, we used OR  
 251 = 1.6 after rounding off one decimal place. The OR for intervention group compared to control group  
 252 is defined as  $OR = 1/1.6 = 0.625$ .

253

254 The number of patients in each group was calculated as follows:

$$n_A = n_B = \frac{\left( Z_{1-\alpha/2} \sqrt{2\bar{p}(1-\bar{p})} + Z_{1-\beta} \sqrt{p_A(1-p_A) + p_B(1-p_B)} \right)^2}{(p_B - p_A)^2}$$

where  $\bar{p} = \frac{p_A + p_B}{2}$ .

255 where  $OR = \frac{p_A/(1-p_A)}{p_B/(1-p_B)} = 0.625$ ,  $p_B = 0.41$ ,  $p_A = 0.30$  (ratio of patients with poor outcome).

256 The significance level (two-tailed test) was  $\alpha = 0.05$  with a power of  $1 - \beta = 0.80$ , and the required  
 257 number of patients per group was 317. The required final sample size was 668 (334 per each arm) for  
 258 a 5% dropout rate.

259

260 Interim analysis will be performed when half of the patients are enrolled in each group. Analysis will



261 be performed by using the alpha spending function with O'Brien–Fleming's boundary method. The  
262 trial will be held when a null hypothesis is rejected ( $Z \geq 2.996$ ,  $\alpha = 0.00274$ ). Interim analysis will  
263 also be conducted in the event that any ethical concerns arise. The DSMB will advise the steering  
264 committee if the trial has significant outcome differences between the two arms, lack of efficacy, or  
265 safety concerns. The steering committee will make trial continuation decisions.  
266

---

### 267 **3. Statistical analysis**

#### 268 **3.1 Statistical principles**

##### 269 **3.1.1 Primary and Secondary outcomes**

270 This trial will analyze one primary efficacy outcome.

271 1. Favorable outcome at 3 months, defined mRS score 0-2

272

273 Two primary safety outcomes will be analyzed.

274 1. Symptomatic intracranial hemorrhage (sICH)

275 2. Death related to the index stroke within 3 months.

276

277 Six secondary outcomes will be analyzed including

278 1. mRS score reduction (shift analysis) at 3 months

279 2. Excellent recovery of NIHSS score at 24h (NIHSS 0-1 or improvement more than 8)

280 3. Recanalization status at 24 hours

281 4. Favorable outcome at 1 month (mRS score 0-2)

282 5. Quality of life measured by Euro-QoL

283 6. Malignant brain edema

284

285 **3.1.2 Software**

286 Analyses will be conducted primarily using SAS (version 9.4, SAS Inc., Cary, NC, USA) and R  
287 Statistical Package (Institute for Statistics and Mathematics, Vienna, Austria, ver 4.1.3, [www.R-](http://www.R-project.org)  
288 [project.org](http://www.R-project.org)).

289

290 **3.2 Data sets analyzed**

291 **3.2.1 Intention-to-treat (ITT) population (primary analysis)**

292 The ITT population will include all randomized patients, regardless of whether they received the  
293 allocated intervention. This will be the population used to evaluate both the efficacy and safety of the  
294 treatment. Patients who withdrew informed consent before BP control will be excluded from this  
295 population.

296

297 **3.2.2 Per-protocol (PP) analysis**

298 The PP analysis group will consist of patients from the efficacy analysis who did not commit any  
299 significant violations of the protocol. These violations include being below 20 years of age, lacking a  
300 final diagnosis of acute ischemic stroke, having SBP less than 140 mmHg, not achieving reperfusion  
301 through IAT (as determined by a TICI score of less than 2b), pre-stroke mRS 3 to 5, failing to obtain  
302 a blinded assessment of the 3-month outcome, and not having controlled BP for 24 hours as per the  
303 assigned intervention (crossover). The PP group will serve as a supplementary analysis to enhance  
304 the findings of the ITT population.

305

306 **3.3 Subject disposition**

307 The flow of patients through the trial will be displayed in a CONSORT (Consolidated Standards of  
308 Reporting Trials) diagram. The report will detail the number of patients randomly assigned and met  
309 the eligibility criteria for the study, along with the number of patients who were ultimately included.

310 It will also specify the reasons for excluding any non-included patients.

311  
312 **3.4 Patient characteristics and baseline comparisons**

313 The baseline characteristics of patients will be presented by the treatment group. The baseline  
314 characteristics of patients will be presented by the treatment group. Discrete variables will be  
315 summarized with frequencies and percentages, calculated based on available data. Continuous  
316 variables will be summarized with mean and standard deviation, or median and interquartile range  
317 (IQR). Baseline data will include all demographic, clinical, and medical information collected at the  
318 start of the study, which may be further defined after investigations and after central adjudication of  
319 brain and vascular imaging are completed (such as the location and extent of large vessel occlusion,  
320 ASPECTS, symptomatic ICH, hemorrhagic transformation, collateral vessel status rating, and  
321 infarction volume).

322  
323 **3.5 Protocol deviation**

324 The protocol deviations will be documented and reported as the number of subjects with a deviation.  
325 A comprehensive list of all protocol deviations will be given, which will provide insight into the  
326 extent and nature of deviations from the study protocol.

327  
328 **3.6 BP management**

329 BP measurements collected during the first 24 hours will be summarized using descriptive plots.  
330 Calculations will be performed for enrollment, 1-hour, 24-hour, and overall 24-hour mean BP and  
331 standard error for each treatment group. The mean between-group difference in SBP and diastolic BP  
332 will be calculated using a linear mixed model, this will be provided difference (95% CI) and p-value.  
333 Time within the target SBP range will be determined based on individual SBP targets (SBP <140  
334 mmHg, SBP 140-180 mmHg, and SBP <180 mmHg). This will be calculated by dividing the hours  
335 spent within the target SBP range by 24 hours. This will be described as mean and standard  
336 deviation. SBP considered out of range will be determined if it exceeds at least once any of the  
337 following thresholds: >180 mmHg, >200 mmHg, or <100 mmHg. The BP-lowering medications

338 administered during the first 24 hours will be described as the number and proportion of participants  
339 receiving each medication. This will include the number of different intravenous medications used.

340  
341

### 342 **3.7 Analysis of the primary outcome**

343 The primary analysis (ITT population) (see section 3.2.1) and analysis using PP population (3.2.2)  
344 will be conducted.

345

#### 346 **3.7.1 Binary analysis of mRS**

347 A binary analysis of the mRS at 3 months will be conducted by categorizing the mRS scores as either  
348 'poor' (scores 3-6) or 'favorable' (scores 0-2) outcomes. The effect of the intervention will be  
349 presented as the OR of a poor outcome, with a 95% CI and risk difference, with 95% CI.

350 Additionally, adjusted analyses will be performed by adding the following covariates: age  
351 (continuous), sex (male vs female), NIHSS score just before IAT (continuous), and onset to  
352 randomization time (continuous). The adjusted treatment effect will be reported as the adjusted OR  
353 and 95% CI. Subgroup analysis will be conducted for this outcome. The number needed to treatment  
354 (or harm) and 95% CI will be reported for this outcome.

355

#### 356 **3.7.2 Symptomatic intracranial hemorrhage (sICH)**

357 The definition for sICH is based on that in the European Cooperative Acute Stroke Study III (ECASS  
358 III) (see Section 2.4.1). These will be reported as the number and proportion of subjects experiencing  
359 an event. The effect of the intervention will be estimated using the same approach as in the binary  
360 analysis of mRS (see Section 3.7.1). We will apply the covariate adjustments described in Section  
361 3.7.1; however, no subgroup or imputed analysis will be performed on this outcome.

362

#### 363 **3.7.3 Death related to the index stroke within 3 months.**

364 A binary analysis of death related to the index stroke within 3 months will be performed. The impact  
365 of the intervention will be calculated using the same method as in the binary analysis of mRS (as  
366 outlined in Section 3.7.1). The covariate adjustments described in Section 3.7.1 will be applied, but  
367 no subgroup or imputed analysis will be conducted for this outcome.

368

### 369 **3.7.4 Subgroup analyses**

370 Twenty one pre-specified subgroup analyses will be carried out, irrespective of whether there is a  
371 significant treatment effect on the primary outcome. Subgroups are defined as follows:

- 372 • Age (<65 vs 65 or more)
- 373 • Sex (female vs male)
- 374 • Hypertension (yes vs no)
- 375 • Diabetes (yes vs no)
- 376 • Hyperlipidemia (yes vs no)
- 377 • Smoking (yes vs no)
- 378 • Atrial fibrillation (yes vs no)
- 379 • Congestive heart failure (yes vs no)
- 380 • CAOD (yes vs no)
- 381 • Previous stroke (yes vs no)
- 382 • Active cancer (yes vs no)
- 383 • Pre-stroke mRS
- 384 • Onset time to puncture (<6 vs ≥6 hours)
- 385 • Presumed etiological subtype according to TOAST classification
- 386 • NIHSS score just before IAT (<15 vs >15)
- 387 • TICI score immediately after EVT (2b or 2c vs 3)
- 388 • Occlusion site (ICA, MCA, VBA, PCA, or ACA)

- 389 • Site (Anterior, posterior, or multiple)
- 390 • ASPECTS (0-5, 6-8, 9-10)
- 391 • Collateral grade (good, poor)
- 392 • IV thrombolysis administered (yes vs no)

393

394 The analysis for each subgroup will be performed by adding the subgroup variable and its interaction  
395 with the intervention as fixed effects to the main logistic regression model. The summary statistics  
396 within each subgroup will consist of raw counts and percentages for each treatment arm, as well as  
397 the OR of treatment effect along with a 95% CI. The findings will be displayed in a forest plot,  
398 including the p-value for heterogeneity resulting from the interaction between the subgroup variable  
399 and the intervention.

400

#### 401 **3.7.5 Treatment of missing data**

402 For missing data, no imputation or additional processing will be performed.

403

#### 404 **3.8 Analysis of the secondary outcome**

405 The primary analysis (ITT population) (see section 3.2.1) and analysis using PP population (3.2.2)  
406 will be conducted.

407

##### 408 **3.8.1 Shift analysis of mRS**

409 The mRS score reduction will be analyzed using shift analysis. An ordinal logistic regression will be  
410 applied to evaluate the distribution of mRS over a 3-month period. The primary impact of the  
411 intervention will be calculated as the OR of a lower mRS between the intervention group and the  
412 control group, determined from an ordinal logistic model. To verify the proportional odds  
413 assumption, a score test will be employed. The graphical representation of shifts across categories

414 will be made through bar plots and binary analysis. To address cases where the proportional odds  
415 assumption for covariates is not met, we will use a partial proportional odds logistic regression as a  
416 secondary analysis. The covariate adjustments described in Section 3.7.1 will be applied, but no  
417 subgroup analysis or imputed analysis will be conducted for this outcome.

418

### 419 **3.8.2 NIHSS sore at 24 hours**

420 The NIHSS score at 24 hours will be analyzed as a continuous variable. Univariable and  
421 multivariable linear regression analysis will be performed based on treatment groups. No subgroup  
422 analysis or imputed analysis will be conducted for this outcome.

423

### 424 **3.8.3 Excellent recovery of NIHSS score at 24 hours**

425 The outcome of excellent recovery of NIHSS score at 24 hours (NIHSS 0-1 or improvement of more  
426 than 8) will be analyzed using the same approach as the mRS score described in Section 3.7.1 The  
427 covariate adjustments described in Section 3.7.1 will be utilized, but no subgroup analysis or  
428 imputed analysis will be conducted for this outcome.

429

### 430 **3.8.4 Recanalization status at 24 hours**

431 Recanalization (TICI score  $\geq 2b$ ) at 24 hours will be analyzed using the same approach as the mRS  
432 score described in Section 3.7.1 The covariate adjustments described in Section 3.7.2 will be utilized,  
433 but no subgroup analysis or imputed analysis will be conducted for this outcome.

434

### 435 **3.8.5 Favorable outcome at 1 month (mRS score 0-2)**

436 The favorable outcome at 1 month, defined as an mRS score of 0-2, will be analyzed using the same  
437 approach as the mRS score described in Section 3.7.1 The covariate adjustments described in Section  
438 3.7.2 will be utilized, but no subgroup analysis or imputed analysis will be conducted for this

439 outcome.

440

### 441 **3.8.6 Euro-QoL**

442 The total Euro-QoL score will be analyzed as a continuous variable. Univariable and multivariable  
443 linear regression analysis will be performed based on treatment groups. No subgroup analysis or  
444 imputed analysis will be conducted for this outcome.

445

### 446 **3.8.7 Malignant brain edema**

447 The occurrence of malignant brain edema will be analyzed using the same method as the mRS score  
448 described in Section 3.7.1 The covariate adjustments outlined in Section 3.7.2 will be applied, but no  
449 subgroup analysis or imputed analysis will be performed for this outcome.

450

### 451 **3.9 Interim analysis plan**

452 The study includes one formal interim analysis after one-half of the patients have completed their 90-  
453 day follow-up. In the interim analysis, primary efficacy outcome (favorable outcome at 3 months)  
454 analysis will be performed using the alpha spending function with O'Brien–Fleming's boundary  
455 method. The trial will be held when a null hypothesis is rejected ( $Z \geq 2.996$ ,  $\alpha_1=0.00274$ ). The  
456 interim analysis will also be conducted in the event that any ethical concerns arise. The DSMB will  
457 advise the steering committee if the trial has significant outcome differences between the two arms,  
458 lack of efficacy, or safety concerns. The steering committee will make trial continuation decisions.

459

460

461



---

## 462 4. References

- 463 1. Ferro JM. Cardioembolic stroke: an update. *Lancet Neurol* 2003;2:177-188.
- 464 2. Kim YJ, Hur J, Shim CY, Lee HJ, Ha JW, Choe KO, et al. Patent foramen ovale: diagnosis with  
465 multidetector CT--comparison with transesophageal echocardiography. *Radiology* 2009;250:61-67.
- 466 3. Hur J, Kim YJ, Lee HJ, Nam JE, Ha JW, Heo JH, et al. Dual-enhanced cardiac CT for detection of  
467 left atrial appendage thrombus in patients with stroke: a prospective comparison study with  
468 transesophageal echocardiography. *Stroke* 2011;42:2471-2477.
- 469 4. Romero J, Cao JJ, Garcia MJ, Taub CC. Cardiac imaging for assessment of left atrial appendage  
470 stasis and thrombosis. *Nat Rev Cardiol* 2014;11:470-480.
- 471 5. Nam HS, Kim EY, Kim SH, Kim YD, Kim J, Lee HS, Nam CM, Heo JH. Prediction of thrombus  
472 resolution after intravenous thrombolysis assessed by CT-based thrombus imaging. *Thromb Haemost*  
473 2012;107:786-794.
- 474 6. Kim YD, Nam HS, Kim SH, Kim EY, Song D, Kwon I, Yang SH, Lee K, Yoo J, Lee HS, Heo JH.  
475 Time-Dependent Thrombus Resolution After Tissue-Type Plasminogen Activator in Patients With  
476 Stroke and Mice. *Stroke* 2015;46:1877-1882.
- 477 7. Yoo HS, Kim YD, Lee HS, Song D, Song TJ, Kim BM, Kim DJ, Kim DI, Heo JH, Nam HS.  
478 Repeated thrombolytic therapy in patients with recurrent acute ischemic stroke. *J Stroke*  
479 2013;15:182-188.
- 480 8. Song D, Lee K, Kim EH, Kim YD, Kim J, Song TJ, Lee HS, Nam HS, Heo JH. Value of utilizing  
481 both ASPECTS and CT angiography collateral score for outcome prediction in acute ischemic stroke.  
482 *Int J Stroke* 2015;10:1018-1023.
- 483 9. Kim YD, Cha MJ, Kim J, Lee DH, Lee HS, Nam CM, Nam HS, Heo JH. Long-term mortality in  
484 patients with coexisting potential causes of ischemic stroke. *Int J Stroke* 2015;10:541-546.
- 485 10. Nam HS, Han SW, Ahn SH, Lee JY, Choi HY, Park IC, Heo JH. Improved time intervals by

486 implementation of computerized physician order entry-based stroke team approach. *Cerebrovasc Dis*  
487 2007;23:289-293.

488 11. Nam HS, Lee KY, Kim YD, Choi HY, Cho HJ, Cha MJ, Nam CM, Heo JH. Failure of complete  
489 recanalization is associated with poor outcome after cardioembolic stroke. *Eur J Neurol*  
490 2011;18:1171-1178.

491 12. Nam HS, Lee KY, Han SW, Kim SH, Lee JY, Ahn SH, Kim DJ, Kim DI, Nam CM, Heo JH.  
492 Prediction of long-term outcome by percent improvement after the first day of thrombolytic  
493 treatment in stroke patients. *J Neurol Sci* 2009;281:69-73.

494 13. Nam HS, Kim HC, Kim YD, Lee HS, Kim J, Lee DH, Heo JH. Long-term mortality in patients  
495 with stroke of undetermined etiology. *Stroke* 2012;43:2948-2956.

496 14. Yoo J, Song D, Baek JH, Lee K, Jung Y, Cho HJ, Yang JH, Cho HJ, Choi HY, Kim YD, Nam HS,  
497 Heo JH. Comprehensive code stroke program to reduce reperfusion delay for in-hospital stroke  
498 patients. *Int J Stroke* 2016;11:656-662.

499 15. Song D, Lee K, Kim EH, Kim YD, Lee HS, Kim J, Song TJ, Ahn SS, Nam HS, Heo JH. Gray-  
500 Matter Volume Estimate Score: A Novel Semi-Automatic Method Measuring Early Ischemic Change  
501 on CT. *J Stroke* 2016;18:80-86.

502 16. Choi HY, Kim EH, Yoo J, Lee K, Song D, Kim YD, Cho HJ, Nam HS, Lee KY, Lee HS, Heo JH.  
503 Decision-Making Support Using a Standardized Script and Visual Decision Aid to Reduce Door-to-  
504 Needle Time in Stroke. *J Stroke* 2016;18:239-241.

505 17. Cho BH, Kim JT, Lee JS, et al. Associations of various blood pressure parameters with functional  
506 outcomes after endovascular thrombectomy in acute ischaemic stroke. *Eur J Neurol* 2019;26:1019-  
507 1027.

508 18. Maier IL, Tsogkas I, Behme D, et al. High systolic blood pressure after successful endovascular  
509 treatment affects early functional outcome in acute ischemic stroke. *Cerebrovasc Dis* 2018;45:18-25.

510 19. Mistry EA, Mistry AM, Nakawah MO, et al. Systolic blood pressure within 24 hours after

511 thrombectomy for acute ischemic stroke correlates with outcome. J Am Heart Assoc 2017;6.  
512 20. Goyal N, Tsivgoulis G, Pandhi A, et al. Blood pressure levels post mechanical thrombectomy and  
513 outcomes in large vessel occlusion strokes. Neurology 2017;89:540-547.  
514

515 **5. Figure**

516 **Figure 1. CONSORT flowchart**

517

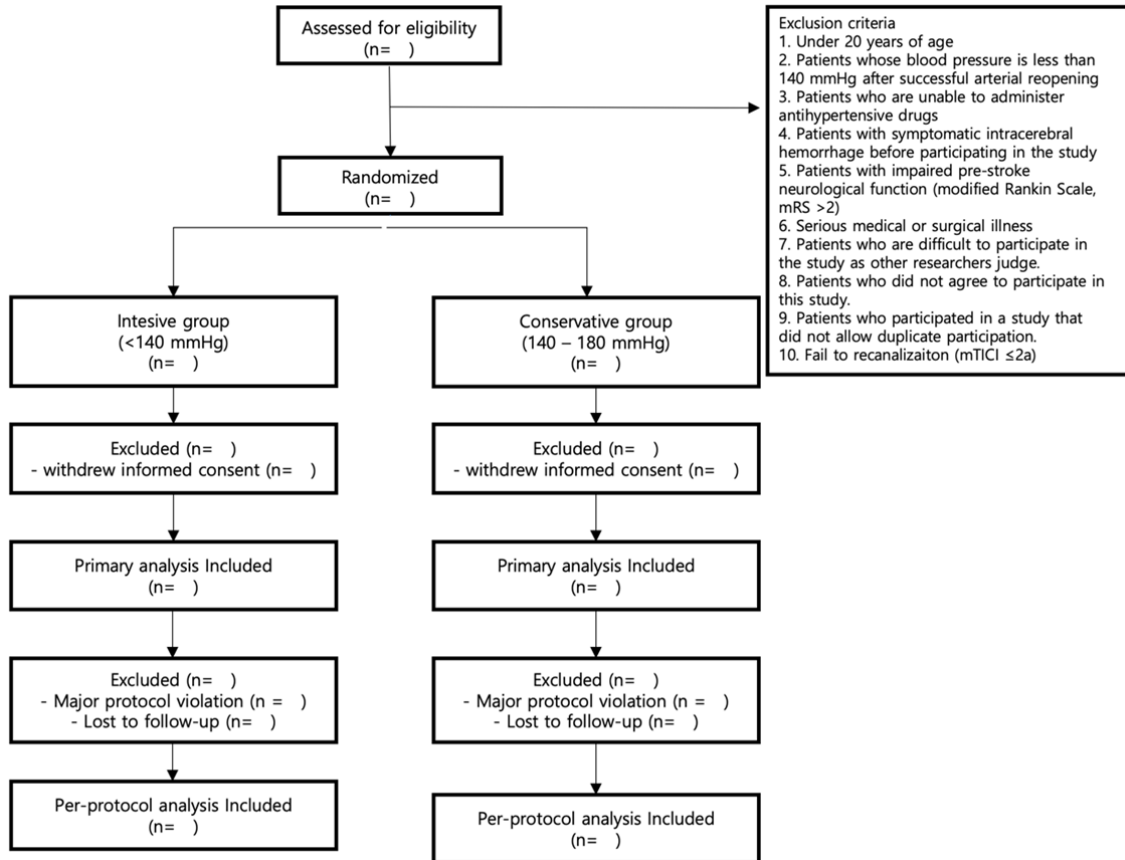

518

519

## 520 **6. Summary of statistical analysis plan change**

### 521 **1. Sample size change**

522 An error was identified in the sample size calculation (see red fonts), leading to an adjustment  
523 from 644 to 688 participants after receiving approval from the Institutional Review Board.

524

### 525 **Sample size calculation in OPTIMAL-BP Protocol V 1.0**

#### 526 **1. Number of clinical trial subjects calculated**

527 644 patients (322 in each group, significance level  $\alpha=0.05$ , statistical power  $1-\beta=0.80$ ,

528 dropout rate 5%)

529

#### 530 **2. Hypothesis**

531  $H_0$ : OR = 1 (the odds ratio for groups A and B is the same)

532  $H_1$ : OR  $\neq$  1 (the odds ratio for groups A and B is not the same)

533

#### 534 **3. Sample size calculation**

535 We conducted a systematic review to determine the sample-size calculation. We searched

536 Medline and Embase for relevant clinical studies published between January 1993 and

537 October 2019. The following search terms were used: “BP,” “hypertension,”

538 “thrombectomy,” or “endovascular.” We manually searched references of identified studies.

539 Searches were restricted to human studies with full English text. The reference lists of

540 retrieved reports were also hand searched for potentially relevant studies not identified in our

541 electronic database search.

542 Studies included in this analysis met the following criteria: (1) IAT for ischemic stroke, (2)

543 inclusion of patients with acute ischemic stroke with large-vessel occlusion, (3) analysis

544 comparing the outcomes according to BP within 24 hours after successful recanalization with

545 IAT, and (4) outcome measurements, including mRS score, at 90 days or sICH. We also  
546 obtained the baseline characteristics from each study: sample size, intervention type,  
547 intervention time, baseline NIHSS score, baseline BP, functional outcome or 90-day  
548 mortality, and symptomatic ICH. Two reviewers (YDK and JKC) independently extracted  
549 data, and disagreements were resolved by consensus. For continuous outcomes (90-day  
550 ordinal mRS score) and dichotomous outcomes (symptomatic ICH), we used the odds ratio  
551 (OR) with 95% CI and *P*-values to assess the likelihood of outcomes.

552

553 Of a total of 3,436 articles identified, 9 met the inclusion criteria (Figure A). Among the  
554 seven articles regarding the outcome, two were excluded: one because we could not calculate  
555 the effect size, and the other because no regression coefficient was reported. Finally, five  
556 papers that used continuous SBP were chosen. The OR was calculated using the generic  
557 inverse variance estimation method. A 10-mmHg increase in the mean SBP  $\leq$  24 hours after  
558 successful recanalization with IAT was correlated with worse 90-day mRS (OR 1.45, 95% CI  
559 1.14–1.83, *p* = 0.002) (Figure B). Symptomatic ICH was not associated with a mean SBP  
560 increase of 10 mmHg after successful recanalization with IAT (OR 1.14, 95% CI 0.91–1.43, *p*  
561 = 0.267) (Figure C).

562

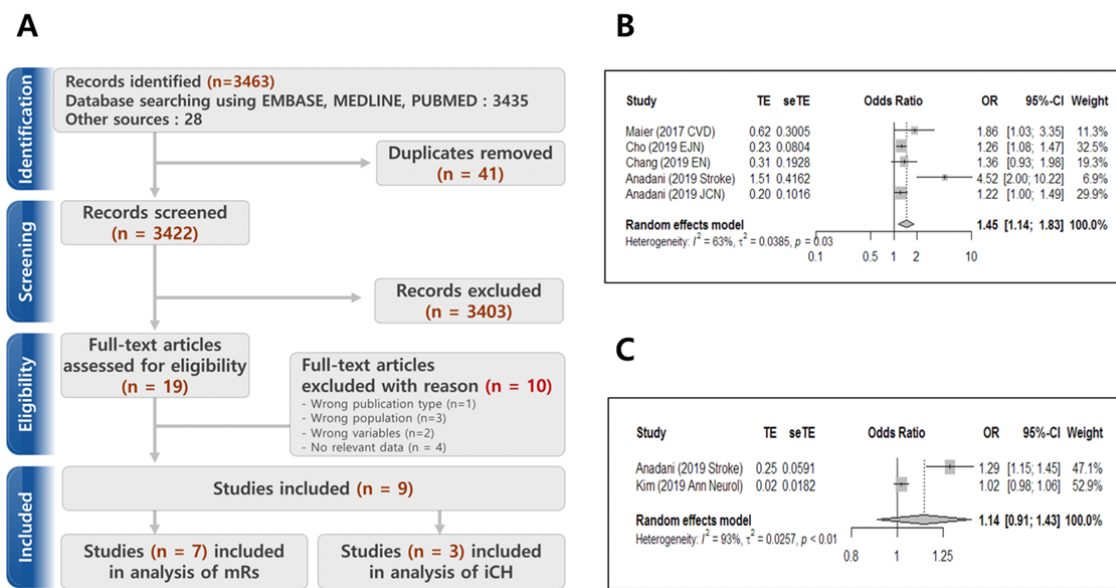

563

564

565 A study by Goyal et al. used a design similar to ours with an aggressive SBP-lowering target  
 566 of <140 mmHg.<sup>1</sup> They compared an aggressive SBP-lowering target of <140 / 90 mmHg with  
 567 a moderate or permissive BP target of <185 / 105 mmHg.

568

| Studies                       | Ordinal or logistic regression | OR (95% CI)             | Adjusted OR (95% CI) per 10 mmHg for poor outcome | Number of patients | Measurements   |
|-------------------------------|--------------------------------|-------------------------|---------------------------------------------------|--------------------|----------------|
| 1 Maier (2017) <sup>2</sup>   | OR (1 mmHg) for good outcome   | 0.94 (0.88–0.99)        | 1.86 (1.11–3.59)                                  | 168                | Continuous SBP |
| 2 Cho (2019) <sup>3</sup>     | OR (10 mmHg) for ordinal mRS   | 1.26 (1.08–1.48)        | 1.26 (1.08–1.48)                                  | 313                | Continuous SBP |
| 3 Chang (2019) <sup>4</sup>   | OR (10 mmHg) for ordinal mRS   | 1.36 (0.93–1.98)        | 1.36 (0.93–1.98)                                  | 90                 | Continuous SBP |
| 4 Anadani (2019) <sup>5</sup> | OR (1 mmHg) for good outcome   | 0.86 (0.79–0.93)        | 4.52 (2.07–10.56)                                 | 1149               | Continuous SBP |
| 5 Anadani (2019) <sup>6</sup> | OR (1 mmHg) for good outcome   | 0.98 (0.96–0.999)       | 1.22 (1.01–1.50)                                  | 276                | Continuous SBP |
| Subtotal                      | OR (10 mmHg) for ordinal mRS   |                         | <b>1.45 (1.14–1.83)</b>                           | 1996               |                |
| 6 Goyal (2017) <sup>1</sup>   | OR for poor                    | <b>2.19 (0.54–8.86)</b> |                                                   | 140                | Target SBP     |

|  |                                                     |                  |  |  |  |
|--|-----------------------------------------------------|------------------|--|--|--|
|  | outcome<br>(ref: intensive<br>group)                |                  |  |  |  |
|  | OR for good<br>outcome<br>(ref: intensive<br>group) | 0.46 (0.11–1.84) |  |  |  |

569

570 **Outcome according to target BPs in Goyal's article<sup>1</sup>**

|                                                            | Good outcome<br>(mRS 0–2) | Poor outcome<br>(mRS 3–6) | Total      |
|------------------------------------------------------------|---------------------------|---------------------------|------------|
| Intensive group<br>(Target BP < 140/90 mmHg)               | 7 (70%)                   | 3 (30%)                   | 10 (100%)  |
| Moderate or permissive group<br>(Target BP < 185/105 mmHg) | 67 (52%)                  | 63 (48%)                  | 130 (100%) |

571

572 According to the study by Goyal et al., the calculated OR of poor outcome in the moderate or  
573 permissive group was 2.19 (95% CI 0.54–8.86) compared with that of the intensive group.

574

575  $OR \text{ for poor outcome} = \frac{63/67}{3/7} = 2.19$

576  $CI = \left( e^{\ln(OR) - 1.96 \sqrt{\frac{1}{63} + \frac{1}{67} + \frac{1}{3} + \frac{1}{7}}}, e^{\ln(OR) + 1.96 \sqrt{\frac{1}{63} + \frac{1}{67} + \frac{1}{3} + \frac{1}{7}}} \right)$

577 Using these ORs, we calculated the weighted average as follows:

578

$$OR^* = \frac{m_1}{M} OR_1 + \frac{m_2}{M} OR_2 = \frac{140}{539} \times 2.19 + \frac{399}{539} \times 1.45 = 1.64$$

579

580 where OR1 is from Goyal et al.'s study<sup>6</sup> and OR2 is from our systematic review. Finally, we

581 used OR = 1.6 after rounding off one decimal place.



582 The number of patients in each group was calculated as follows:

$$n_A = n_B = \left( \frac{1}{p_A(1-p_A)} + \frac{1}{p_B(1-p_B)} \right) \left( \frac{z_{1-\frac{\alpha}{2}} + z_{1-\beta}}{\ln(OR^*)} \right)^2$$

583 where  $OR = \frac{p_A(1-p_A)}{p_B(1-p_B)} = 1.6$  (weighted averaged OR) and  $p_B = 0.41$  (ratio of poor outcome  
584 patients). The significance level (two-tailed test) was  $\alpha = 0.05$  with a power of  $1 - \beta = 0.80$ ,  
585 and the required number of patients per group was 287. The required final sample size was  
586 644 (322 per each arm) for a 5% dropout rate.

587

588 Interim analysis will be performed when half of the patients are enrolled in each group.  
589 Analysis will be performed by using the alpha spending function with O'Brien-Fleming's  
590 boundary method. The trial will be hold when a null hypothesis is rejected ( $Z \geq 2.996$ ,  
591  $\alpha = 0.00274$ ). Interim analysis will also be conducted in the event that any ethical concerns  
592 arise. The DSMB will advise the steering committee if the trial has significant outcome  
593 differences between the two arms, lack of efficacy, or safety concerns. The steering  
594 committee will make trial continuation decisions.
