# Supplementary material
Source: PubMed Central journal article supplement (PMC10481233)
Supplement: jama-e2314590-s004.pdf [file jama-e2314590-s004.pdf]

\*First name, last name, and suffix (if applicable) are required and will appear in PubMed.

| <b>*Group Name(s): OPTIMAL-BP Trial Investigators</b> |                   |                              |                  |                                                                                                                             |                                          |                                                         |                                                                                            |
|-------------------------------------------------------|-------------------|------------------------------|------------------|-----------------------------------------------------------------------------------------------------------------------------|------------------------------------------|---------------------------------------------------------|--------------------------------------------------------------------------------------------|
| <b>*First Name and Middle Initial(s)</b>              | <b>*Last Name</b> | <b>*Suffix (eg, Jr, III)</b> | Academic Degrees | Institution                                                                                                                 | Location (city, state/province, country) | Role or Contribution, eg, chair, principal investigator | Group (if more than 1 Group listed in the byline) and/or Subgroup (eg, Steering Committee) |
| Soyoung                                               | Jeon              |                              | PhD              | Biostatistics Collaboration Unit, Yonsei University College of Medicine                                                     | Seoul, South Korea                       | Statistician                                            |                                                                                            |
| Solji                                                 | Choi              |                              | B.S.             | Department of Neurology, Yonsei University College of Medicine                                                              | Seoul, South Korea                       | Clinical Research Associate, Data                       |                                                                                            |
| You Yeon                                              | Ko                |                              | B.S.             | Department of Neurology, Yonsei                                                                                             | Seoul, South Korea                       | Data collection                                         |                                                                                            |
| Hyemi                                                 | Lee               |                              | B.S.             | Department of Neurology, Yonsei                                                                                             | Seoul, South Korea                       | Clinical Research                                       |                                                                                            |
| Mi Hee                                                | Kim               |                              | B.S.             | Department of Neurology, Gachon University Gil Medical Center, Incheon, South Korea                                         | Incheon, South Korea                     | Clinical Research Coordinator                           |                                                                                            |
| Seungmin                                              | Song              |                              | B.S.             | Clinical research coordinator, Department of Neurology Stroke and Neurocritical care, Dongsan Hospital, Keimyung University | Daegu, South Korea                       | Clinical Research Coordinator                           |                                                                                            |
| Han Sol                                               | Oh                |                              | B.S.             | National Health Insurance Service Ilsan Hospital                                                                            | Goyang-si, South Korea                   | Clinical Research Coordinator                           |                                                                                            |
| Heejeong                                              | Kim               |                              | B.S.             | Department of neurology, Pusan National University Hospital                                                                 | Busan, South South Korea                 | Clinical Research Coordinator                           |                                                                                            |
| Okkyung                                               | chang             |                              | B.S.             | Department of Neurology, Ewha Womans University Mokdong Hospital                                                            | Seoul, South Korea                       | Clinical Research Coordinator, Data collection          |                                                                                            |
| Giseon                                                | Jeong             |                              | B.S.             | Department of Neurology, Chosun university Hospital                                                                         | Gwangju, Kore                            | Clinical Research Coordinator                           |                                                                                            |
| Moonju                                                | Kim               |                              | B.S.             | Department of Neurology, Chosun university Hospital                                                                         | Gwangju, South Korea                     | Clinical Research Coordinator                           |                                                                                            |
| Hyun Jung                                             | Shin              |                              | B.S.             | Neurology of Ewha Womans University Seoul Hospital                                                                          | Seoul, South Korea                       | Clinical Research Coordinator                           |                                                                                            |
| Su-jin                                                | Han               |                              | B.S.             | Neurology of Ewha Womans University Seoul Hospital                                                                          | Seoul, South Korea                       | Clinical Research Coordinator                           |                                                                                            |

## Supplemental Online Content: Nonauthor Collaborators

\*First name, last name, and suffix (if applicable) are required and will appear in PubMed.

| *First Name and Middle Initial(s) | *Last Name | *Suffix (eg, Jr, III) | Academic Degrees | Institution                                                                                                      | Location (city, state/province, country) | Role or Contribution, eg, chair, principal investigator | Group (if more than 1 Group listed in the byline) and/or Subgroup (eg, Steering Committee) |
|-----------------------------------|------------|-----------------------|------------------|------------------------------------------------------------------------------------------------------------------|------------------------------------------|---------------------------------------------------------|--------------------------------------------------------------------------------------------|
| Hajeong                           | Jeong      |                       | B.S.             | Kyungpook National University Hospital Neurology                                                                 | Daegu, South Korea                       | Clinical research coordinator                           |                                                                                            |
| A Young                           | Kim        |                       | B.S.             | Department of Neurology, Asan Medical Center                                                                     | Seoul, South Korea                       | Clinical Research Coordinator                           |                                                                                            |
| Joohee                            | Bang       |                       | B.S.             | Department of Neurology, South Korea University Guro Hospital and College of Medicine, Seoul, South Korea        | Seoul, South Korea                       | Clinical Research Coordinator                           |                                                                                            |
| Joeng A                           | Shin       |                       | B.S.             | Yongin Severance Hospital, Yonsei University College of Medicine, South Korea                                    | Yongin, South Korea                      | Clinical Research Coordinator                           |                                                                                            |
| Jin Suk                           | Bae        |                       | B.S.             | Department of Neurology, Daejeon Eulji Medical Center, Eulji University School of Medicine, Daejeon, South Korea | Daejeon, South Korea                     | Clinical Research Coordinator                           |                                                                                            |
