# Supplementary material
Source: PubMed Central journal article supplement (PMC10481233)
Supplement: jama-e2314590-s005.pdf [file jama-e2314590-s005.pdf]

Nam HS, Kim YD, Heo J, et al; OPTIMAL-BP Trial Investigators. Intensive vs conventional blood pressure lowering after endovascular thrombectomy in acute ischemic stroke. *JAMA*. Published September 5, 2023.  
doi:10.1001/jama.2023.14590

## Data Sharing Statement

### Data

**Data available:** Yes

**Data types:** Data dictionary

**How to access data:** [hsnam@yuhs.ac](mailto:hsnam@yuhs.ac)

**When available:** With publication

### Supporting Documents

**Document types:** None

### Additional Information

**Who can access the data:** researchers whose proposed use of the data has been approved

**Types of analyses:** for a specified purpose

**Mechanisms of data availability:** after approval of a proposal
